# Supplementary material
Source: publisher figshare collection journal article supplement (https://asha.figshare.com/articles/dataset/_/24463543)
Supplement: Supplementary file 2 [file 1]

**Supplemental Material S2.** Two-sided  $z$ -tests for independent proportions for test set stratifications of exact match accuracy for Experiments 1–4.

| Exp               | Comparison                                                   | $z$    | $p$    |
|-------------------|--------------------------------------------------------------|--------|--------|
| 1. Baseline       | Human agreement = 100% vs. human agreement < 100%            | 6.232  | < .001 |
|                   | Human confidence > median vs. human confidence $\leq$ median | 6.401  | < .001 |
|                   | WAB-R AQ > median vs. WAB-R AQ $\leq$ median                 | 4.698  | < .001 |
|                   | Fluent participants vs. nonfluent participants               | 2.691  | .007   |
| 2. Controls       | Human agreement = 100% vs. human agreement < 100%            | 8.882  | < .001 |
|                   | Human confidence > median vs. human confidence $\leq$ median | 9.227  | < .001 |
|                   | WAB-R AQ > median vs. WAB-R AQ $\leq$ median                 | 5.295  | < .001 |
|                   | Fluent participants vs. nonfluent participants               | 3.151  | < .001 |
| 3. PWA            | Human agreement = 100% vs. human agreement < 100%            | 12.528 | < .001 |
|                   | Human confidence > median vs. human confidence $\leq$ median | 12.149 | < .001 |
|                   | WAB-R AQ > median vs. WAB-R AQ $\leq$ median                 | 4.714  | < .001 |
|                   | Fluent participants vs. nonfluent participants               | 2.649  | .008   |
| 4. Controls + PWA | Human agreement = 100% vs. human agreement < 100%            | 13.050 | < .001 |
|                   | Human confidence > median vs. human confidence $\leq$ median | 12.711 | < .001 |
|                   | WAB-R AQ > median vs. WAB-R AQ $\leq$ median                 | 4.299  | < .001 |
|                   | Fluent participants vs. nonfluent participants               | 2.811  | .005   |

*Note.* Fluent participants are those with Wernicke, anomic, conduction, or transcortical sensory aphasia, or those considered “non-aphasic” by the WAB-R. Nonfluent participants are those with Broca, global, or transcortical motor aphasia. 46 out of 332 total sessions had unavailable WAB-R results and were excluded just from analyses involving WAB-R scores. Exp = experiment; PWA = people with aphasia; WAB-R AQ = Western Aphasia Battery–Revised Aphasia Quotient.
